# Supplementary material
Source: publisher figshare collection journal article supplement (https://karger.figshare.com/ndownloader/files/30833806)
Supplement: Supplementary file 1 [file 30833806]

## Sheet: Sheet1
Supplementary Material: Raw Data Used in This Study
Follow-up raw data based on date after treatment					Heatshock protein level in all lung cancer patients			Heatshock protein level in patients based on type of lung cancer
Surgery group		Non-surgery group			Patients No.	Level		Type of cancer	Level
Level	Date	Level	Date
54.8887	83.0277	163.723	84.5325		1	57.9069		Adenocarcinoma carcinoma	145.644
39.2694	84.3883	116.305	84.8523		2	222.89		Adenocarcinoma carcinoma	125.264
75.2338	85.8185	140.354	84.9344		3	160.044		Adenocarcinoma carcinoma	171.866
13.3071	86.5824	165.456	85.3916		4	1.94374		Adenocarcinoma carcinoma	130.726
39.3184	86.7322	155.265	87.4309		5	205.515		Adenocarcinoma carcinoma	63.1977
74.5068	90.387	154.575	88.2239		6	121.55		Adenocarcinoma carcinoma	117.242
31.8539	92.9933	142.79	89.5796		7	159.471		Adenocarcinoma carcinoma	0.2
33.374	93.3834	96.7111	90.319		8	88.5899		Adenocarcinoma carcinoma	34.8413
28.4029	93.6023	80.4355	93.7173		9	86.9377		Adenocarcinoma carcinoma	170.268
51.5537	98.4279	118.562	94.538		10	182.329		Adenocarcinoma carcinoma	102.423
53.2617	100.802	127.923	94.7817		11	22.8574		Adenocarcinoma carcinoma	125.828
36.8164	101.254	122.101	95.268		12	187.458		Adenocarcinoma carcinoma	128.355
40.0084	101.312	151.487	95.6948		13	124.691		Adenocarcinoma carcinoma	195.247
43.2072	101.896	117.842	96.4182		14	187.93		Adenocarcinoma carcinoma	77.515
34.652	102.094	131.734	97.1097		15	1.2		Adenocarcinoma carcinoma	133.246
40.1994	107.241	135.463	97.2728		16	50.5268		Adenocarcinoma carcinoma	112.713
38.5424	107.707	145.899	97.3776		17	252.269		Adenocarcinoma carcinoma	183.799
56.5197	108.854	120.035	98.0897		18	1		Adenocarcinoma carcinoma	84.302
23.5772	114.775	126.525	98.6369		19	78.7566		Adenocarcinoma carcinoma	51.2462
30.6342	115.359	146.67	98.8152		20	113.428		Adenocarcinoma carcinoma	87.5725
51.9911	115.747	139.414	99.3205		21	132.241		Adenocarcinoma carcinoma	132.256
33.3014	115.958	140.228	101.62		22	22.349		Adenocarcinoma carcinoma	284.891
24.7488	117.683	85.5045	103.392		23	126.351		Adenocarcinoma carcinoma	340.797
57.1453	117.801	110.656	103.532		24	214.129		Adenocarcinoma carcinoma	98.0202
26.0804	118.907	142.888	104.13		25	207.471		Adenocarcinoma carcinoma	97.2597
21.3107	120.173	103.035	104.234		26	121.624		Adenocarcinoma carcinoma	103.16
41.3643	120.515	74.5636	104.348		27	98.1989		Adenocarcinoma carcinoma	65.0225
41.5224	123.585	123.171	105.311		28	19.3701		Adenocarcinoma carcinoma	124.622
16.7984	126.998	67.6773	105.899		29	29.8198		Adenocarcinoma carcinoma	202.525
26.7301	127.197	108.9	106.763		30	64.8357		Adenocarcinoma carcinoma	106.425
59.8796	128.429	173.907	106.8		31	88.6149		Adenocarcinoma carcinoma	51
32.1017	128.645	173.057	107.017		32	275.977		Adenocarcinoma carcinoma	76.2721
83.4506	128.919	152.352	107.145		33	195.46		Adenocarcinoma carcinoma	51.4509
65.9338	131.496	178.698	107.948		34	189.346		Adenocarcinoma carcinoma	117.044
30.5822	131.565	129.967	111.587		35	197.952		Adenocarcinoma carcinoma	141.133
28.0629	132.049	141.119	111.638		36	1		Adenocarcinoma carcinoma	131.207
57.005	133.27	141.514	111.827		37	111.474		Adenocarcinoma carcinoma	146.148
31.5829	133.944	157.812	113.203		38	177.832		Adenocarcinoma carcinoma	121.512
62.5927	138.572	96.3182	115.103		39	56.6239		Adenocarcinoma carcinoma	113.659
44.9525	139.878	172.132	119.171		40	159.827		Adenocarcinoma carcinoma	113.738
37.3721	140.255	80.1431	119.427		41	125.468		Adenocarcinoma carcinoma	230.876
48.2127	140.258	112.083	121.733		42	21.7189		Adenocarcinoma carcinoma	136.426
57.4163	141.99	109.856	122.247		43	191.926		Adenocarcinoma carcinoma	115.277
38.8405	146.468	155.773	125.78		44	82.9414		Adenocarcinoma carcinoma	163.801
38.2152	147.094	94.4144	126.242		45	62.1627		Adenocarcinoma carcinoma	153.218
51.3675	151.435	183.7	126.36		46	92.9449		Adenocarcinoma carcinoma	102.938
38.3863	154.8	114.733	128.737		47	318.957		Adenocarcinoma carcinoma	288.91
58.7842	161.143	145.027	129.043		48	55.5863		Adenocarcinoma carcinoma	151.694
6.35648	161.628	174.14	129.356		49	93.5566		Adenocarcinoma carcinoma	1.2
57.2511	161.681	95.2999	131.789		50	104.365		Adenocarcinoma carcinoma	132.094
38.9306	162.779	103.307	133.019		51	94.9915		Adenocarcinoma carcinoma	32.8043
74.505	165.084	114.294	134.455		52	111.404		Adenocarcinoma carcinoma	107.42
43.6109	165.961	144.118	135.936		53	102.707		Adenocarcinoma carcinoma	111.023
39.3193	166.183	73.5586	138.906		54	173.113		Adenocarcinoma carcinoma	156.381
33.4101	166.342	95.585	139.301		55	115.689		Adenocarcinoma carcinoma	59.5921
22.3299	167.872	124.262	140.158		56	93.6741		Adenocarcinoma carcinoma	186.728
13.6056	168.208	140.593	140.684		57	155.572		Adenocarcinoma carcinoma	141.665
38.2165	169.724	85.8271	143.82		58	70.7364		Adenocarcinoma carcinoma	138.426
48.7734	170.537	170.819	144.139		59	129.655		Adenocarcinoma carcinoma	178.453
54.4597	172.48	78.7616	144.415		60	137.634		Adenocarcinoma carcinoma	57.6958
39.3902	173.863	103.355	144.775		61	241.429		Adenocarcinoma carcinoma	126.506
29.0451	176.033	81.4645	146.557		62	180.317		Adenocarcinoma carcinoma	184.391
35.7176	176.306	106.591	147.103		63	180.144		Adenocarcinoma carcinoma	179.854
40.4942	177.244	151.007	147.398		64	145.983		Adenocarcinoma carcinoma	134.51
35.7911	183.332	60.032	147.906		65	152.394		Adenocarcinoma carcinoma	111
36.313	188.596	176.566	151.353		66	47.0903		Adenocarcinoma carcinoma	189.133
25.8616	189.457	76.8695	152.018		67	157.598		Adenocarcinoma carcinoma	200.177
26.0956	189.539	133.248	152.722		68	94.4144		Adenocarcinoma carcinoma	144.671
41.6033	190.587	143.529	153.341		69	91.355		Adenocarcinoma carcinoma	237.474
28.6225	193.318	110.75	154.338		70	169.24		Adenocarcinoma carcinoma	123.988
45.166	193.824	125.492	154.684		71	0.2		Adenocarcinoma carcinoma	224.546
61.2484	195.014	133.48	155.659		72	48.9565		Adenocarcinoma carcinoma	119.199
32.4682	195.358	59.7508	156.432		73	61.3433		Adenocarcinoma carcinoma	156.8
44.698	199.748	97.519	157.047		74	25.1555		Adenocarcinoma carcinoma	80.3138
31.2437	200.227	140.506	157.227		75	6.94393		Adenocarcinoma carcinoma	57.9443
61.1644	202.257	119.799	158.117		76	22		Adenocarcinoma carcinoma	89.7792
12.6477	203.016	114.543	160.769		77	1.08145		Adenocarcinoma carcinoma	12
46.9052	203.143	149.31	162.24		78	77.4043		Adenocarcinoma carcinoma	175.54
46.2489	203.263	149.255	162.989		79	42		Adenocarcinoma carcinoma	143.131
62.094	203.852	110.343	166.248		80	145.644		Adenocarcinoma carcinoma	149.547
18.4763	204.709	129.365	166.644		81	125.264		Adenocarcinoma carcinoma	9
39.7343	205.784	199.763	167.013		82	171.866		Adenocarcinoma carcinoma	201.081
39.2327	205.968	134.188	167.236		83	130.726		Adenocarcinoma carcinoma	19.3433
45.7937	206.021	156.389	167.652		84	63.1977		Adenocarcinoma carcinoma	265.349
26.2532	208.168	160.702	168.559		85	117.242		Adenocarcinoma carcinoma	176.273
63.0774	210.873	113.533	172.924		86	0.2		Adenocarcinoma carcinoma	77.4043
35.0397	212.338	98.3907	173.719		87	34.8413		Adenocarcinoma carcinoma	71.4793
22.1753	212.457	140.11	173.777		88	170.268		Adenocarcinoma carcinoma	116.75
52.8703	213.765	131.539	174.354		89	102.423		Adenocarcinoma carcinoma	240.818
29.5804	215.913	92.2531	174.695		90	125.828		Adenocarcinoma carcinoma	216.075
34.7488	216.2	120.823	181.707		91	128.355		Adenocarcinoma carcinoma	194.089
13.4375	217.603	160.154	183.184		92	195.247		Adenocarcinoma carcinoma	0.22
48.4662	217.864	165.459	183.974		93	77.515		Adenocarcinoma carcinoma	168.22
16.5421	221.096	152.15	185.995		94	133.246		Adenocarcinoma carcinoma	62.5567
47.066	223.212	119.901	186.474		95	112.713		Adenocarcinoma carcinoma	50.0358
29.4084	223.74	128.211	188.277		96	183.799		Adenocarcinoma carcinoma	76.5075
35.1484	225.201	177.839	189.442		97	84.302		Adenocarcinoma carcinoma	110.775
46.3983	228.169	101.09	190.64		98	51.2462		Adenocarcinoma carcinoma	22
23.5395	228.964	74.5425	191.143		99	87.5725		Adenocarcinoma carcinoma	42
42.0474	229.262	193.143	192.478		100	132.256		Adenocarcinoma carcinoma	97
42.6334	230.283	128.184	192.98		101	284.891		Adenocarcinoma carcinoma	49.652
50.7136	232.463	121.494	194.839		102	340.797		Adenocarcinoma carcinoma	19
28.492	232.892	182.364	195.728		103	98.0202		Adenocarcinoma carcinoma	200.971
56.1939	234.436	83.3334	197.2		104	97.2597		Adenocarcinoma carcinoma	126.249
35.9313	236.566	122.389	197.276		105	103.16		Adenocarcinoma carcinoma	86.2338
41.5403	237.318	81.6891	198.229		106	65.0225		Adenocarcinoma carcinoma	143.858
42.2774	238.828	127.191	198.374		107	124.622		Adenocarcinoma carcinoma	223.617
31.9074	238.916	162.69	198.639		108	202.525		Adenocarcinoma carcinoma	176.86
57.2379	239.892	115.707	201.402		109	106.425		Adenocarcinoma carcinoma	47
33.6602	240.008	162.907	202.016		110	51		Adenocarcinoma carcinoma	10
50.5846	240.511	103.535	209.904		111	76.2721		Adenocarcinoma carcinoma	83.4867
62.401	240.723	117.543	219.112		112	51.4509		Adenocarcinoma carcinoma	168.275
36.6712	241.37	97.1825	221.152		113	117.044		Adenocarcinoma carcinoma	95.9953
25.8626	242.541	108.724	223.04		114	141.133		Adenocarcinoma carcinoma	170.431
34.2466	243.019	116.642	226.877		115	131.207		Adenocarcinoma carcinoma	30
52.7654	243.023	139.515	227.323		116	146.148		Adenocarcinoma carcinoma	112.451
43.459	243.331	97.0847	227.357		117	121.512		Adenocarcinoma carcinoma	109.427
22.4668	243.924	95.7413	228.365		118	113.659		Adenocarcinoma carcinoma	30
37.2191	244.009	99.4398	228.49		119	113.738		Adenocarcinoma carcinoma	12.3053
47.96	244.188	129.953	228.604		120	230.876		Adenocarcinoma carcinoma	141.113
15.2307	244.8	113.023	228.655		121	136.426		Adenocarcinoma carcinoma	133.87
31.0466	245.783	112.748	230.001		122	115.277		Adenocarcinoma carcinoma	82.0028
37.5344	247.108	143.617	230.35		123	163.801		Adenocarcinoma carcinoma	154.939
22.2914	251.986	183.114	230.704		124	153.218		Adenocarcinoma carcinoma	92.7521
14.3397	254.779	107.088	230.786		125	102.938		Adenocarcinoma carcinoma	56.9162
52.1674	255.083	81.1757	230.859		126	288.91		Adenocarcinoma carcinoma	119.255
28.6461	255.289	109.966	232.849		127	151.694		Adenocarcinoma carcinoma	265.976
54.7134	257.444	161.096	233.599		128	1.2		Adenocarcinoma carcinoma	113.915
37.191	263.701	153.326	233.835		129	132.094		Adenocarcinoma carcinoma	180.807
36.6711	264.989	114.476	234.638		130	32.8043		Adenocarcinoma carcinoma	66.5531
50.5127	265.026	84.0892	235.078		131	107.42		Adenocarcinoma carcinoma	298.172
36.0754	266.329	110.244	235.451		132	111.023		Adenocarcinoma carcinoma	177.178
18.9915	266.569	161.543	235.722		133	156.381		Adenocarcinoma carcinoma	118.254
63.8027	266.925	150.97	237.576		134	59.5921		Adenocarcinoma carcinoma	136.301
54.6309	267.87	87.2919	237.663		135	186.728		Adenocarcinoma carcinoma	223.099
35.0135	267.911	130.756	238.012		136	141.665		Adenocarcinoma carcinoma	14.1794
18.0753	268.906	80.3938	239.592		137	138.426		Adenocarcinoma carcinoma	157.682
18.3532	269.235	144.001	240.003		138	178.453		Adenocarcinoma carcinoma	87.1354
32.167	269.433	118.441	240.694		139	57.6958		Adenocarcinoma carcinoma	105.642
53.4024	269.891	163.625	240.968		140	126.506		Adenocarcinoma carcinoma	101.494
15.6297	270.318	101.582	243.227		141	184.391		Adenocarcinoma carcinoma	27.0165
56.4514	273.361	124.433	246.004		142	179.854		Adenocarcinoma carcinoma	10
58.0174	273.724	106.111	247.528		143	134.51		Adenocarcinoma carcinoma	130.907
17.7218	276.249	135.812	247.59		144	111		Adenocarcinoma carcinoma	22.6089
26.3357	276.337	159.328	247.736		145	189.133		Squamous cell carcinoma	196.299
16.8809	276.492	121.944	250.178		146	200.177		Squamous cell carcinoma	30
31.4284	276.747	110.673	250.319		147	144.671		Squamous cell carcinoma	72.6314
42.0057	277.137	106.759	250.722		148	237.474		Squamous cell carcinoma	135.12
44.0492	277.595	51.8393	253.403		149	123.988		Squamous cell carcinoma	106.325
36.6641	281.4	136.308	253.892		150	224.546		Squamous cell carcinoma	147.318
24.5568	282.523	114.757	254.6		151	119.199		Squamous cell carcinoma	100
38.2895	282.793	162.935	255.504		152	156.8		Squamous cell carcinoma	90
30.4604	283.131	90.2502	257.795		153	80.3138		Squamous cell carcinoma	137.405
47.6574	283.202	188.644	257.988		154	57.9443		Squamous cell carcinoma	252.65
39.6475	283.843	84.2242	258.926		155	89.7792		Squamous cell carcinoma	130.037
64.6376	284.407	142.429	259.784		156	12		Squamous cell carcinoma	133.775
57.3468	284.92	151.841	260.334		157	175.54		Squamous cell carcinoma	8.2
28.8235	285.36	104.653	262.836		158	143.131		Squamous cell carcinoma	40.3746
26.5722	286.287	92.9509	263.88		159	149.547		Squamous cell carcinoma	31.9648
22.1881	286.725	154.697	265.013		160	9		Squamous cell carcinoma	30
54.9872	287.2	94.1453	265.041		161	201.081		Squamous cell carcinoma	100
43.3461	290.384	99.9035	266.991		162	19.3433		Squamous cell carcinoma	55.8136
43.8279	291.154	109.234	268.502		163	265.349		Squamous cell carcinoma	114.386
46.1186	291.345	104.113	269.314		164	176.273		Squamous cell carcinoma	46.5251
66.0551	291.848	138.902	270.703		165	77.4043		Squamous cell carcinoma	40.1495
20.5309	292.742	129.449	270.787		166	71.4793		Squamous cell carcinoma	36.3432
31.5637	294.709	88.0398	270.796		167	116.75		Squamous cell carcinoma	68.8954
39.4576	296.257	92.3077	271.32		168	240.818		Squamous cell carcinoma	84.6763
16.9589	297.437	197.103	271.945		169	216.075		Squamous cell carcinoma	80.8408
19.8048	297.911	63.0613	272.617		170	194.089		Squamous cell carcinoma	73.6375
32.7371	299.715	161.121	272.791		171	0.22		Squamous cell carcinoma	99.38
42.9572	300.091	107.033	273.819		172	168.22		Squamous cell carcinoma	31.2766
10.5398	300.77	133.565	274.622		173	62.5567		Squamous cell carcinoma	112.435
19.2041	301.108	100.622	275.577		174	50.0358		Squamous cell carcinoma	77.3459
24.82	301.627	102.67	275.601		175	76.5075		Squamous cell carcinoma	38.6864
36.495	302.143	170.754	276.801		176	110.775		Squamous cell carcinoma	107.521
56.7684	302.739	192.648	278.104		177	22		Squamous cell carcinoma	96.7316
17.2074	303.181	71.3135	278.426		178	42		Squamous cell carcinoma	13.8114
24.6731	303.567	64.7162	280.678		179	97		Squamous cell carcinoma	85.5793
58.4193	304.682	65.7239	281.375		180	49.652		Squamous cell carcinoma	60.7538
8.07515	305.592	79.8539	282.845		181	19		Squamous cell carcinoma	42.5451
33.6708	309.271	145.507	283.693		182	200.971		Squamous cell carcinoma	72.5315
39.0867	310.539	102.709	284.208		183	126.249		Squamous cell carcinoma	47.9549
67.5259	311.04	118.642	285.716		184	86.2338		Squamous cell carcinoma	50.3955
62.5327	311.061	105.23	285.974		185	143.858		Squamous cell carcinoma	77.8696
59.2289	313.353	135.571	286.168		186	223.617		Squamous cell carcinoma	61.7066
57.5235	313.513	122.921	287.72		187	176.86		Squamous cell carcinoma	112.567
42.7469	314.377	111.339	287.903		188	47		Squamous cell carcinoma	64.7703
59.3073	315.509	170.236	290.163		189	10		Squamous cell carcinoma	62.5035
60.905	315.92	86.9338	290.364		190	83.4867		Squamous cell carcinoma	69.9348
31.6591	316.819	119.148	290.4		191	168.275		Squamous cell carcinoma	67.6329
59.1912	317.414	93.764	292.69		192	95.9953		Squamous cell carcinoma	51.0106
28.7284	317.674	158.535	292.85		193	170.431		Giant cell carcinoma	70.6195
38.485	318.832	148.618	293.431		194	30		Giant cell carcinoma	102.191
31.5726	319.062	85.6805	293.614		195	112.451		Giant cell carcinoma	47.2121
80.8613	319.959	111.211	293.803		196	109.427		Giant cell carcinoma	110.705
17.9786	320.441	102.453	295.233		197	30		Giant cell carcinoma	61.0775
34.5255	321.38	140.471	295.91		198	12.3053		Giant cell carcinoma	117.043
66.8144	321.608	68.2796	299.361		199	141.113		Giant cell carcinoma	93.5229
54.9226	321.899	131.348	299.904		200	133.87		Giant cell carcinoma	0.22
19.4536	322.408	90.4763	302.811		201	82.0028		Giant cell carcinoma	72.9607
25.7521	323.835	135.916	302.947		202	154.939		Giant cell carcinoma	66.986
47.8462	324.173	90.8718	307.82		203	92.7521		Giant cell carcinoma	67.9885
56.6751	325.087	119.034	308.495		204	56.9162		Giant cell carcinoma	52.8867
44.5906	325.492	104.671	309.334		205	119.255		Giant cell carcinoma	65.552
24.4313	325.827	92.6694	311.335		206	265.976		Giant cell carcinoma	45.4632
65.8109	325.897	116.292	312.419		207	113.915		Giant cell carcinoma	73.6754
24.2786	327.215	107.212	312.508		208	180.807		Giant cell carcinoma	117.576
49.9826	328.262	121.046	313.121		209	66.5531		Giant cell carcinoma	86.5581
34.6954	328.361	172.709	314.021		210	298.172		Giant cell carcinoma	38.6555
2.59483	328.873	122.336	314.438		211	177.178		Giant cell carcinoma	54.6414
59.2295	329.336	107.7	316.213		212	118.254		Giant cell carcinoma	58.7952
24.046	329.475	111.842	317.099		213	136.301		Giant cell carcinoma	19.3086
34.3981	330.628	173.678	318.259		214	223.099		Giant cell carcinoma	32.447
58.0466	330.937	160.174	319.145		215	14.1794		Giant cell carcinoma	80.1002
35.422	331.69	104.673	319.48		216	157.682		Giant cell carcinoma	96.9554
50.5987	335.489	145.422	319.734		217	87.1354		Giant cell carcinoma	79.9311
13.8861	336.859	96.8201	321.005		218	105.642		Giant cell carcinoma	113.848
62.3883	337.506	161.237	322.441		219	101.494		Giant cell carcinoma	116.147
8.63182	338.909	94.8903	323.305		220	27.0165		Giant cell carcinoma	57.1626
16.6697	340.707	141.622	324.179		221	10		Giant cell carcinoma	43.0587
15.2286	341.971	71.3591	324.608		222	130.907		Giant cell carcinoma	1.52089
40.7472	342.465	55.1474	324.768		223	22.6089		Giant cell carcinoma	29.2736
55.0344	342.903	129.643	326.35		224	196.299		Giant cell carcinoma	55.5403
31.813	343.099	169.604	326.639		225	30		Giant cell carcinoma	27.5777
57.0722	343.211	130.783	328.764		226	72.6314		Giant cell carcinoma	37.8505
43.942	343.228	91.0738	329.375		227	135.12		Giant cell carcinoma	36.4063
35.9875	344.896	76.8666	329.416		228	106.325		Giant cell carcinoma	82.9727
56.4986	346.506	94.1108	329.622		229	147.318		Giant cell carcinoma	118.25
22.86	348.28	126.957	330.565		230	100		Giant cell carcinoma	65.4608
46.0844	350.513	137.783	331.968		231	90		Giant cell carcinoma	81.671
34.1465	352.03	93.0113	332.68		232	137.405		Giant cell carcinoma	20.2876
51.5464	352.448	185.261	334.774		233	252.65		Giant cell carcinoma	109.871
47.0721	352.624	151.206	336.414		234	130.037
21.5478	356.685	143.693	338.148		235	133.775
41.9859	357.513	176.835	339.709		236	8.2
43.7269	357.649	105.597	340.006		237	40.3746
3.05498	358.065	100.325	340.985		238	31.9648
52.5458	358.194	104.011	341.023		239	30
41.8118	358.894	105.522	341.314		240	100
21.7355	359.577	144.897	341.817		241	55.8136
15.0373	360.232	96.5891	342.134		242	114.386
51.0332	360.403	106.555	342.706		243	46.5251
56.028	360.651	146.676	344.265		244	40.1495
47.1566	361.205	78.3432	344.467		245	36.3432
32.2379	362.475	122.201	345.809		246	68.8954
41.8019	364.543	123.508	346.854		247	84.6763
33.6799	364.592	128.049	347.324		248	80.8408
48.5142	365	165.838	349.686		249	73.6375
55.2089	365.091	137.056	349.739		250	99.38
43.3912	365.224	121.76	350.141		251	31.2766
12.927	366.087	118.408	351.008		252	112.435
23.7209	368.099	103.273	351.183		253	77.3459
5.33143	368.322	157.658	351.78		254	38.6864
32.5522	369.658	109.301	352.517		255	107.521
53.5618	370.005	109.865	353.298		256	96.7316
6.8955	370.461	136.122	356.086		257	13.8114
40.8314	371.053	86.3652	356.192		258	85.5793
31.3155	371.107	103.395	356.612		259	60.7538
32.4753	372.999	129.125	356.922		260	42.5451
40.301	373.677	83.1582	356.941		261	72.5315
62.9415	374.09	179.987	358.632		262	47.9549
42.273	374.394	139.851	358.723		263	50.3955
36.4085	374.49	98.2232	359.356		264	77.8696
64.9802	374.908	133.677	360.363		265	61.7066
74.4172	375.04	114.174	362.42		266	112.567
41.9728	375.502	69.2562	365.821		267	64.7703
19.6282	376.145	142.884	367.346		268	62.5035
45.7285	378.85	162.373	367.608		269	69.9348
50.6039	379.432	85.0186	367.666		270	67.6329
16.8846	379.777	117.349	368.382		271	51.0106
31.1856	380.046	139.443	369.375		272	70.6195
29.0854	382.265	79.1224	369.851		273	102.191
42.7006	383	126.83	369.912		274	47.2121
56.2439	384.15	100.094	370.284		275	110.705
44.7137	385.252	104.513	373.249		276	61.0775
25.3092	385.965	134.712	374.408		277	117.043
31.2802	386.09	139.9	375.321		278	93.5229
44.1586	386.697	71.17	375.859		279	0.22
63.1491	386.986	49.7864	376.642		280	72.9607
25.5687	388.204	134.245	378.713		281	66.986
43.19	388.504	156.201	379.159		282	67.9885
20.4602	389.311	99.406	381.218		283	52.8867
4.16808	389.727	160.516	381.722		284	65.552
46.3732	390.229	156.133	381.82		285	45.4632
48.251	392.818	130.948	382.131		286	73.6754
29.9008	393.056	148.185	382.216		287	117.576
38.6583	394.447	190.323	382.815		288	86.5581
28.9861	395.26	108.822	383.022		289	38.6555
46.2207	395.381	63.9522	385.764		290	54.6414
67.146	397.57	125.467	385.827		291	58.7952
63.8947	397.644	118.856	385.874		292	19.3086
27.5003	398.439	108.687	386.419		293	32.447
22.4883	399.178	100.867	387.835		294	80.1002
38.3798	399.884	156.047	388.313		295	96.9554
-5.12205	400.037	126.848	389.347		296	79.9311
44.287	400.721	121.692	389.451		297	113.848
29.5805	401.532	154.231	389.733		298	116.147
43.5801	401.666	109.308	389.846		299	57.1626
82.608	402.828	95.2788	391.811		300	43.0587
37.4932	404.69	20.2372	394.759		301	1.52089
44.1924	404.911	107.985	396.173		302	29.2736
43.8632	409.65	156.562	397.908		303	55.5403
58.245	409.893	150.105	398.347		304	27.5777
35.8485	410.1	109.546	398.385		305	37.8505
62.7458	411.41	116.913	400.039		306	36.4063
59.7035	412.495	160.007	400.157		307	82.9727
20.7614	414.454	83.1348	401.046		308	118.25
44.321	415.493	91.0135	402.903		309	65.4608
72.8738	415.993	94.7862	403.967		310	81.671
39.7866	417.346	39.1497	404.747		311	20.2876
42.2197	418.415	104.454	406.579		312	109.871
60.6615	419.919	94.7847	407.196
30.9115	420.562	68.8345	407.516
23.7293	420.864	111.414	409.382
40.4421	421.391	144.342	416.578
36.016	421.602	65.3137	416.641
37.1223	422.298	138.735	417.163
39.3531	422.771	124.267	417.327
34.626	422.889	153.926	420.435
59.0402	423.667	78.6063	420.575
34.1076	424.631	129.841	421.067
48.8477	425.009	108.833	421.417
57.1738	425.16	123.942	424.055
34.4899	425.393	91.9309	425.342
38.907	425.678	113.912	425.439
39.3895	427.3	141.508	425.5
52.8168	427.865	59.5238	426.906
14.0778	429.884	95.258	427.59
25.4585	429.973	115.091	429.957
45.8163	430.077	95.2581	431.142
42.3552	430.736	71.2715	433.484
23.1112	430.996	123.344	433.669
28.2996	431.819	142.757	433.937
48.9032	432.595	68.7351	434.322
39.6877	433.337	88.9441	434.354
48.1022	434.03	121.491	434.916
45.5964	434.183	180.713	435.96
76.8535	434.556	77.7413	436.099
36.1467	434.784	120.665	436.339
51.9718	434.973	127.62	437.393
0.414802	436.398	155.945	438.151
36.6987	437.928	132.794	438.825
24.8819	440.58	93.862	438.905
42.6934	441.547	178.544	441.36
40.7984	441.654	107.405	442.701
46.1593	442.752	133.356	443.655
27.1782	442.932	181.53	444.321
22.3119	443.458	144.981	446.439
34.1843	443.476	158.851	447.118
31.9282	444.13	126.129	447.134
36.4766	444.572	107.984	447.699
39.3803	444.621	81.4427	448.432
36.6604	444.807	122.581	449.098
31.0917	444.966	94.8326	449.555
15.3004	445.835	155.396	450.505
56.9318	446.797	163.111	452.794
31.2252	447.242	166.889	453.904
36.5284	448.856	52.4528	454.425
50.6368	450.321	149.133	454.811
33.8721	451.117	132.496	456.046
55.2796	451.127	72.7637	456.162
25.0231	452.187	40.0454	456.201
23.2473	453.367	83.1798	456.423
66.9896	454.652	67.0369	456.588
75.841	454.831	148.693	456.687
-1.02731	454.889	90.8397	456.981
-27.0137	455.479	74.9323	457.065
58.6659	456.143	131.775	457.563
19.9733	456.148	123.406	459.802
37.2079	457.55	102.276	460.389
13.9171	458.313	143.015	461.395
46.6133	458.947	106.458	461.764
19.6689	459.041	108.482	462.168
44.0491	460.028	137.084	462.349
38.6706	460.565	127.847	464.641
25.2602	460.706	110.542	465.135
17.5891	461.563	180.791	465.839
43.4806	463.229	127.15	466.676
50.7341	463.325	104.313	466.902
41.04	463.948	56.8072	468.068
20.2344	465.227	108.768	468.571
54.0442	465.646	160.605	469.221
70.7207	465.749	50.8246	469.363
34.066	465.978	128.017	471.081
44.0123	466.836	121.133	472.049
31.5462	467.412	64.8441	472.655
33.4034	468.14	97.542	472.825
46.0194	472.116	178.094	474.521
46.5534	472.392	92.5642	475.496
30.7536	474.763	76.0896	476.473
36.7181	475.087	153.486	478.819
16.4647	475.143	113.195	484.573
65.3347	475.181	161.15	485.12
16.6564	475.5	105.588	486.123
26.9483	476.542	32.8141	486.536
46.1682	477.432	168.273	487.868
43.4705	478.448	156.631	488.066
29.4647	478.763	104.335	488.398
36.166	478.769	113.845	488.588
39.8317	482.067	84.2448	489.964
33.1384	483.426	105.76	490.496
67.9262	483.808	120.609	491.94
9.68812	483.979	96.5979	493.442
39.6648	484.678	76.0183	493.61
38.9582	485.319	79.1151	494.425
31.909	485.761	89.2708	495.101
59.3856	485.961	87.8963	497.099
58.577	487.155	98.6406	497.178
39.4767	487.91	102.028	497.457
25.029	488.189	104.521	497.89
47.7645	490.42	148.721	498.819
43.7943	490.902	128.817	499.374
91.8372	491.623	138.759	499.61
48.0025	491.639	157.164	500.016
61.0619	492.204	108.072	500.522
25.3954	493.071	82.2781	500.966
52.2942	493.081	79.9697	500.984
45.1181	493.481	149.635	501.455
26.2433	493.82	94.8704	502.155
45.8978	494.209	137.811	503.02
47.3544	495.033	90.0438	504.361
48.5635	495.611	157.85	505.639
31.7662	496.452	110.518	505.678
17.5988	496.902	108.385	508.041
52.2456	498.229	134.239	508.074
44.8651	498.745	175.056	509.935
42.9499	503.807	164.832	510.369
54.0806	504.255	162.265	511.151
51.8871	504.675	94.8722	511.615
64.7835	505.732	88.9486	511.972
61.9036	507.859	153.572	512.525
34.6324	508.133	153.636	513.572
77.5194	508.959	111.703	513.848
46.1168	509.229	92.2012	515.725
10.2464	510.057	111.175	515.919
30.1737	510.214	72.3613	516.105
15.2602	510.806	153.793	517.359
45.2385	511.435	100.858	517.727
40.1402	512.782	115.6	518.307
48.4857	514.252	158.971	519.042
40.7743	514.617	111.4	520.288
9.98539	516.523	111.816	521.066
48.0818	516.897	96.2262	521.632
65.2378	516.937	136.242	522.686
38.8315	518.235	102.529	525.54
41.9648	518.306	160.309	526.532
43.5305	519.216	163.208	526.978
49.6663	520.035	109.848	528.832
23.2906	521.631	103.475	529.739
43.5303	522.035	152.415	530.725
52.6622	523.032	117.371	531.909
43.4598	523.305	110.324	532.119
26.7468	524.115	138.323	533.414
49.1189	524.323	101.507	533.548
44.8947	525.145	154.191	533.575
33.4979	525.16	150.023	537.175
29.7351	525.231	70.8664	537.458
59.4112	526.198	103.976	538.326
9.89896	526.995	98.0961	539.529
52.1897	527.124	106.328	541.493
49.5748	527.411	92.9026	541.975
52.0403	528.026	79.9432	542.127
26.7963	530.373	100.644	544.59
40.0581	531.065	145.266	545.974
55.5775	531.763	143.029	546.304
25.4512	532.123	86.0377	549.376
63.4481	533.408	100.824	549.387
30.7047	533.497	109.785	549.617
45.4012	535.042	115.406	551.349
51.4629	535.4	133.755	551.938
51.7819	535.631	148.393	553.747
50.3001	535.678	147.411	554.762
31.3074	536.504	91.72	555.587
21.2731	537.58	165.867	557.546
11.2077	538.209	110.909	557.842
37.7698	538.628	105.096	557.846
69.9907	539.198	174.282	558.014
55.5812	539.335	130.159	558.093
67.5952	540.816	79.4437	558.453
68.9996	540.993	115.423	559.699
40.1963	542.696	104.881	560.485
55.7427	543.522	104.163	560.622
27.0054	544.461	102.316	563.277
68.8383	544.858	101.671	563.367
41.3318	545.459	126.461	564.47
17.6384	546.729	153.416	564.864
34.236	548.304	77.8359	564.905
50.8949	549.239	185.7	564.906
29.0732	551.366	87.3128	565.588
29.517	551.484	151.443	566.485
32.1699	551.845	119.572	566.878
45.5558	552.085	118.995	567.322
21.5807	552.561	88.8162	567.615
53.7126	556.359	205.201	567.852
35.2908	557.365	143.038	569.144
24.7457	560.597	80.3554	570.165
50.5394	561.689	124.885	571.29
43.9962	562.488	141.795	571.635
34.21	563.296	151.854	572.158
37.4961	563.863	195.539	572.607
1.722	565.61	105.488	573.805
49.2358	566.247	127.479	574.523
-1.43892	566.296	169.648	574.995
24.7255	566.806	111.771	577.03
50.3757	567.484	122.955	577.632
38.2114	568.356	128.478	578.502
40.9045	568.645	85.3205	578.923
46.8605	569.097	177.326	580.707
53.0539	569.902	136.149	580.757
64.6269	570.505	121.674	581.149
64.3788	571.344	121.554	581.209
56.405	571.909	60.7432	581.865
65.1636	572.843	147.804	582.667
72.5656	573.424	158.511	584.043
55.585	573.672	30.9201	584.43
75.5643	574.169	127.627	584.586
79.1936	575.637	111.244	585.396
72.1443	577.129	110.893	586.134
40.481	577.344	112.588	586.193
38.5528	578.644	138.718	587.103
52.2659	579.644	141	587.118
69.0479	581.192	109.759	588.987
35.9778	581.865	101.243	589.864
52.0136	582.681	134.529	590.33
73.3143	586.347	106.756	590.382
56.7674	587.928	117.583	591.898
67.6743	588.631	116.532	592.541
79.209	588.676	147.51	594.229
70.2448	589.309	132.531	594.929
60.3549	589.314	163.935	594.972
73.1126	589.479	127.191	595.172
49.5638	590.16	103.231	598.633
62.2467	590.42	121.676	599.258
47.731	591.366	139.79	599.27
53.6262	591.676	172.26	601.073
43.9407	592.261	113.995	601.112
60.1667	593.481	120.73	602.169
44.0128	593.753	136.554	602.399
83.0138	594.42	146.875	604.338
41.0549	594.774	193.999	604.717
83.6444	595.507	83.2955	605.114
37.9378	595.925	136.831	605.15
40.9355	596.507	126.853	606.832
51.5508	597.758	107.261	610.672
52.6263	597.849	148.959	610.728
38.8781	598.737	122.404	613.538
58.6285	600.626	112.447	613.688
47.9091	603.103	97.2476	614.56
57.931	603.407	111.976	614.637
72.4279	604.615	136.368	615.031
56.101	606.204	103.775	615.828
48.8889	606.375	86.7918	616.217
54.0009	607.304	133.968	617.275
59.1812	608.385	101.181	617.755
59.674	610.366	153.821	617.997
58.7218	612.203	174.522	618.004
70.4452	612.921	105.309	619.739
47.18	613.25	99.4713	621.752
22.9155	613.851	89.243	622.989
50.7829	614.017	128.762	624.814
46.0533	614.066	138.949	625.842
55.4266	614.156	121.466	626.279
68.1185	614.25	158.597	626.34
37.9336	614.944	146.662	626.355
56.2406	616.068	147.476	630.239
50.4904	616.668	96.3384	630.537
58.429	617.349	64.1487	632.27
49.0265	618.155	78.2731	633.126
56.331	618.796	126.248	633.437
75.002	620.784	152.705	634.526
74.9022	621.403	71.4388	635.278
77.9455	622.123	154.351	638.982
56.3503	622.207	136.621	639.222
42.0087	622.696	170.953	639.569
54.4952	622.889	129.648	639.774
62.5753	624.362	104.482	639.807
77.668	625.055	149.411	639.848
51.5462	627.595	112.134	641.031
62.1611	628.075	109.826	641.633
73.2696	628.741	110.239	642.5
96.8347	629.136	62.2096	643.054
56.7763	630.173	111.556	643.567
33.0305	631.806	129.614	644.495
33.0967	631.899	106.967	644.854
53.81	632.611	130.151	645.096
59.4751	633.01	162.349	645.669
89.7183	633.794	185.374	646.412
49.453	634.12	172.442	647.429
50.0692	634.555	88.934	648.814
60.5859	634.719	124.006	649.174
40.1713	634.919	151.353	650.435
33.9195	635.631	131.473	650.571
12.1634	635.774	128.314	650.912
68.7743	636.56	71.0118	652.075
57.6047	637.522	89.8393	652.424
51.5635	638.475	139.489	652.442
92.7338	638.561	136.957	653.994
43.6883	638.913	82.7822	654.442
45.1156	639.287	136.553	655.789
40.8732	640.173	92.3169	655.941
32.9444	640.674	117.323	656.426
22.1878	640.816	126.117	657.712
86.4207	641.482	114.58	657.946
65.2945	642.269	102.462	658.096
31.5351	642.352	164.503	659.336
80.1617	642.567	150.02	661.141
62.4345	642.875	92.226	661.882
60.0611	643.521	120.511	663.34
84.346	644.422	140.2	663.579
59.0438	644.521	125.241	663.959
44.1286	644.9	190.806	664.305
83.0609	646.126	170.586	665.119
41.0658	646.412	138.644	666.21
57.0814	647.027	105.527	666.965
41.0648	647.781	128.586	666.973
75.1807	648.037	77.6807	667.132
81.414	648.202	148.093	668.936
38.2428	649.228	107.828	670.117
60.3694	649.452	118.378	670.654
38.0167	651.429	116.59	671.906
67.2263	651.898	143.599	673.106
58.1328	652.348	112.366	673.854
65.3386	652.834	106.174	673.944
72.898	653.845	100.037	674.257
46.7179	654.05	105.449	675.308
66.4365	655.01	86.2627	675.537
60.1843	656.281	139.391	677.447
70.5231	658.434	104.896	680.732
85.5892	658.822	131.333	681.173
75.9823	659.156	110.566	682.446
45.3181	660.39	84.7862	683.285
55.3213	660.459	88.5033	683.638
57.322	661.717	106.163	685.17
72.8575	661.725	141.05	686.361
81.7909	664.418	144.27	686.419
78.0407	664.827	164.575	687.537
72.5888	665.122	115.293	689.498
45.7812	665.144	134.645	689.672
54.9156	665.198	158.207	692.368
41.8757	665.888	163.243	692.548
72.8372	666.022	141.981	693.314
59.7837	667.248	91.9387	693.619
82.4295	667.759	125.414	695.141
77.0725	668.353	93.6243	696.661
87.2995	668.813	118.675	696.687
32.614	669.018	62.7264	697.28
55.9014	669.265	154.255	697.541
74.2756	669.513	149.963	697.844
49.5871	669.585	158.095	697.845
84.2989	670.246	127.071	697.853
82.0985	671.198	77.7886	698.747
42.0061	672.264	95.0197	700.237
71.3399	673.343	90.5171	700.278
65.7922	674.026	114.556	701.089
24.8847	674.047	93.787	701.181
26.6398	674.06	81.2775	701.465
27.3814	675.337	82.2943	701.839
69.4245	676.294	84.1785	702.12
70.0831	676.947	84.2344	702.739
65.3709	677.362	100.564	705.114
75.3947	677.776	52.4318	705.13
54.2636	678.133	100.959	705.489
82.2849	678.674	78.4081	705.571
47.3061	679.539	104.405	708.187
58.631	680.203	80.6963	709.947
53.1827	680.752	72.1267	710.374
58.0816	681.787	69.201	710.443
60.8364	681.912	108.93	710.699
63.6515	682.348	108.255	713.281
50.8013	682.92	78.081	713.403
45.9938	684.969	111.686	715.89
51.4285	692.144	97.4701	715.994
47.1129	692.237	82.5865	716.416
42.9405	692.945	111.938	716.428
49.6254	693.05	65.0587	716.614
50.2548	694.049	75.7621	717.059
61.7408	694.795	108.052	717.217
64.3055	694.811	96.0088	717.284
77.1922	694.834	97.3126	717.628
74.9053	696.418	79.2659	718.499
79.2956	696.813	75.7099	720.242
95.2182	697.187	94.9537	720.294
83.5685	697.246	75.265	720.336
49.3624	697.259	67.2337	720.445
28.4027	697.496	94.3967	721.103
53.9163	697.659	106.83	721.352
44.5316	698.544	63.5586	721.648
37.7322	698.855	84.9933	722.454
47.0008	700.643	78.4977	724.066
67.4795	700.992	98.4437	725.036
55.2951	701.014	105.339	725.704
71.8673	701.4	89.4688	725.755
45.2418	702.528	105.392	725.992
58.8733	702.831	95.5568	726.052
49.2824	703.16	72.1432	726.437
88.6464	703.277	79.2844	727.036
56.6169	703.658	44.9732	727.661
71.3127	705.104	86.6224	728.162
53.4809	706.305	110.982	728.601
91.7117	706.774	104.863	729.145
81.1728	706.997	97.3503	729.962
53.122	707.199	68.2412	731.008
61.687	708.767	79.499	732.109
60.5495	709.441	101.326	734.418
64.7445	709.988	117.384	734.544
75.5552	710.676	100.659	734.871
45.8925	710.818	88.6103	737.172
44.5547	712.834	70.0001	739.466
89.0151	714.351	96.8906	740.124
72.7218	714.439	77.957	741.109
61.2954	715.262	82.9662	741.537
60.6927	716.451	107.206	742.223
75.7094	717.777	88.2406	742.863
67.9598	718.077	118.812	743.708
57.0931	719.017	72.2797	743.84
76.4903	721.473	79.0451	743.904
43.1865	722.149	91.372	745.456
75.7318	722.693	76.8878	745.739
28.3223	723.596	93.1184	746.849
33.4175	723.828	68.0213	747.566
55.4352	724.47	105.833	747.835
75.5417	725.101	103.77	748.261
54.0064	726.33	97.3609	750.292
68.1749	726.398	108.729	752.564
73.6402	727.945	149.762	752.588
72.726	729.782	97.2887	753.019
63.3959	730.944	105.875	753.632
54.708	731.26	98.8546	753.733
84.9964	733.192	145.153	754.764
47.9432	734.529	118.792	755.2
26.0137	734.88	123.425	756.042
55.5416	735.296	158.793	756.531
48.6266	735.956	152.296	758.341
42.1663	736.452	112.38	761.515
95.462	738.558	71.1058	761.756
49.2078	739.22	125.484	764.289
76.3561	740.438	125.861	765.519
39.9438	740.508	175.781	766.878
74.7153	740.871	105.471	767.311
43.5625	741.786	107.21	767.434
79.1923	742.153	143.573	768.018
48.4281	743.09	111.515	768.501
61.3215	743.885	134.212	769.577
48.3994	743.887	75.975	769.837
42.6166	744.558	146.802	770.142
49.7571	744.815	142.833	770.627
39.0612	745.2	98.2725	772.358
20.2561	745.224	115.125	776.545
65.6835	746.299	120.695	776.831
56.3887	746.408	128.291	778.927
43.5915	747.766	90.5717	778.98
55.6032	748.048	84.4166	779.854
65.1539	748.85	148.095	780.348
60.7933	749.629	133.61	780.587
35.5871	750.599	123.426	782.649
65.9105	750.6	104.517	783.562
86.7664	750.612	124.091	786.76
39.9671	751.347	134.34	789.893
62.7032	751.374	124.689	789.908
51.1175	751.655	96.5344	790.245
56.348	751.853	118.212	790.445
46.7684	751.927	116.186	790.814
29.2016	752.985	155.496	790.883
70.148	753.927	129.974	792.563
36.2788	754.205	108.235	792.657
64.4615	756.102	101.489	792.665
55.5549	756.651	139.827	793.738
70.8705	756.837	112.585	793.738
54.2358	758.868	96.5192	794.412
68.6001	759.012	137.873	794.991
59.3612	759.585	107.368	795.934
26.8143	761.566	82.1899	796.208
67.3539	761.927	107.792	796.23
31.0838	762.726	81.7798	798.845
75.6437	763.53	135.086	799.614
78.3139	763.798	95.6416	799.821
72.915	763.908	95.6925	799.898
44.6622	764.574	109.487	802.22
44.9373	764.886	129.91	804.487
65.1719	764.968	122.459	805.983
23.1654	765.728	142.822	806.879
33.7168	766.867	111.871	807.19
79.1284	767.27	76.3642	807.495
36.4339	768.181	154.698	808.853
79.0894	768.989	113.083	808.874
63.6118	769.189	113.67	809.463
60.4404	769.686	149.583	809.673
34.2911	769.722	138.496	811.691
100.857	770.466	114.774	811.732
48.0005	771.813	131.438	811.76
48.4153	771.955	110.996	812.292
78.3503	774.045	151.253	812.598
38.5112	774.071	98.3369	812.869
80.1151	774.167	93.3573	813.134
65.498	774.432	98.7764	813.615
60.337	774.564	126.059	813.852
68.7774	774.608	71.4806	814.044
73.1884	776.071	105.783	814.385
76.6807	776.288	132.869	815.234
22.0661	777.146	161.579	815.993
60.1982	777.182	104.14	816.751
34.5417	777.253	164.209	817.374
27.5402	777.456	111.402	817.537
64.9638	777.627	110.446	817.962
55.131	778.598	111.344	818.063
41.5227	778.916	141.632	818.741
80.7821	779.765	95.7559	819.245
42.9703	780.969	93.5684	819.43
57.7931	781.147	72.2626	819.957
95.2175	781.295	104.445	820.166
72.9215	782.103	94.001	820.627
48.7178	782.691	123.058	821.245
45.7334	783.429	160.668	821.301
75.3645	783.446	54.959	821.592
37.9973	784.719	141.927	821.634
60.3749	784.744	27.1633	821.711
67.3256	784.745	100.593	821.87
47.2603	784.825	91.7071	823.8
37.8437	785.267	110.017	824.155
19.9639	785.282	97.5754	824.579
52.5977	786.598	140.946	824.765
35.6222	786.659	107.53	826.122
60.6549	787.23	108.496	826.687
73.1561	787.308	99.3373	827.588
51.8659	788.165	154.846	827.837
52.0057	788.785	138.685	827.94
-8.92852	790.088	165.137	829.143
58.6741	790.506	96.7729	831.184
78.077	790.772	133.281	832.332
57.8465	791.185	80.8957	832.83
65.2054	791.725	174.382	833.583
19.8734	791.905	62.6846	833.95
58.3267	793.066	124.283	835.417
77.2583	793.219	70.2968	836.053
80.2309	794.305	133.275	837.595
64.2187	795.07	82.0083	840.226
44.3555	795.797	146.421	840.832
54.754	796.395	89.8921	842.23
71.9523	798.602	110.652	842.409
56.4284	799.678	69.9866	844.408
20.3966	800.017	146.4	845.079
65.893	800.436	136.146	845.384
42.9047	801.03	139.989	848.442
75.6241	802.459	88.5368	848.92
92.6908	804.064	123.514	849.768
74.4785	805.024	113.065	851.424
58.9979	805.14	143.042	852.089
91.5791	805.151	58.9145	852.407
58.7981	805.567	116.838	854.455
50.9104	805.578	182.1	854.649
51.4054	805.953	93.0993	854.72
64.3031	806.475	50.7282	855.574
47.9344	807.718	119.13	856.339
79.3514	808.362	129.01	857.162
46.1491	808.439	118.634	859.764
55.7218	808.898	114.888	860.914
39.5712	809.601	88.4161	862.129
72.7132	812.496	110.256	862.436
71.6648	812.579	152.12	863.23
53.7157	812.881	155.347	863.677
73.7833	813.49	56.2894	865.22
49.3524	813.522	98.8084	865.935
71.75	813.643	169.615	866.043
55.9195	814.727	151.277	867.903
79.9176	815.46	93.1133	867.968
50.7846	817.236	85.9477	868.261
14.8887	817.582	75.8713	869.514
67.9697	817.983	103.138	870.645
78.3565	818.983	104.387	871.804
75.0345	821.144	174.815	873.206
53.5928	821.672	103.534	874.061
73.66	822.403	108.809	874.572
59.3134	822.711	111.391	875.237
59.7864	822.812	105.889	876.042
75.0639	823.49	21.0107	876.597
64.4393	823.642	79.5668	877.292
61.6472	824.229	116.027	878.563
33.6003	825.336	108.37	880.481
94.097	825.67	125.904	881.352
68.8486	826.519	98.6527	882.419
45.073	826.601	70.8998	882.545
32.3459	827.2	122.147	883.67
98.3616	827.672	167.921	884.34
55.0043	828.158	67.7158	884.399
58.9766	829.712	126.325	885.807
31.6772	830.702	155.696	886.294
67.6409	830.746	129.263	886.892
81.3662	830.933	77.1089	887.051
55.3271	831.113	88.9519	887.604
116.123	831.225	105.923	887.649
69.4052	831.238	171.911	888.149
82.7374	831.374	108.257	890.118
87.3397	831.954	128.775	890.31
52.5345	832.777	118.825	892.828
76.2517	832.888	151.717	893.018
107.656	834.186	119.357	893.579
61.2637	834.222	160.747	894.601
75.4947	834.289	75.5206	894.639
57.79	834.555	118.722	895.384
74.5506	835.543	99.0884	897.283
60.6182	836.244	114.864	897.539
100.392	836.412	134.7	898.292
80.4679	836.583	109.083	898.359
108.252	836.763	131.373	898.653
90.2104	837.42	44.6865	899.044
78.1189	838.934	100.855	899.683
73.2759	839.053	115.315	900.294
117.557	839.406	141.592	900.61
68.8001	840.611	68.5302	900.878
81.5105	840.884	130.874	902.547
64.797	841.275	110.235	902.57
62.9111	841.886	146.714	902.638
77.3073	844.61	114.162	902.725
82.4291	844.992	107.612	904.276
96.4682	846.16	76.1112	904.468
94.9364	846.21	85.9675	904.687
48.7167	846.227	89.0075	904.83
95.3909	846.447	178.929	904.969
64.5636	847.574	135.128	907.353
90.1698	847.835	136.272	910.158
84.6235	848.011	79.658	911.33
76.4095	848.227	124.632	912.037
117.499	848.24	137.171	912.602
79.8042	848.621	112.044	914.346
65.3401	849.082	97.8534	914.517
98.5009	849.242	125.431	914.992
80.1584	850.553	139.692	915.585
73.6997	850.558	96.7021	916.079
93.3011	852.848	91.2819	916.132
90.665	854.486	102.932	917.045
64.118	854.93	95.4874	918.653
81.2766	855.716	120.531	919.039
76.1949	855.893	96.4065	920.364
96.159	856.707	134.626	920.696
104.011	856.929	120.851	921.007
85.4587	857.017	110.748	921.6
82.3474	857.856	110.572	922.596
84.1041	858.043	99.4423	923.275
48.7584	858.738	154.617	923.398
64.1935	859.493	136.361	925.138
85.9464	859.598	66.0132	925.588
68.0865	860.206	112.027	927.109
100.592	860.213	81.7451	927.429
62.7523	860.353	126.616	928.648
60.3882	862.201	85.7091	930.721
65.0538	862.658	95.8469	931.345
102.871	863.28	158.649	933.473
91.9758	863.472	89.5482	934.267
68.3073	863.674	151.659	935.526
84.3515	864.36	109.735	936.977
83.4465	865.307	90.5784	937.428
107.947	865.827	113.219	937.999
115.308	866.408	76.2595	938.878
30.2719	866.63	86.1984	939.344
90.4214	866.852	147.116	940.054
106.701	866.876	155.923	940.749
57.6788	867.414	134.7	940.795
57.8094	868.21	136.563	941.097
68.5829	869.356	108.139	945.036
68.0704	869.723	98.1507	946.645
34.0931	870.582	109.091	946.678
60.1462	871.119	98.084	946.778
101.047	871.308	109.895	947.08
27.5004	872.176	68.3741	947.758
31.6833	872.395	88.3749	948.043
58.1537	872.912	60.3581	948.089
69.9107	873.181	111.278	948.296
77.4968	874.07	131.426	948.696
78.4665	874.868	90.9639	948.767
61.978	874.966	105.923	950.356
74.8096	875.057	199.218	950.931
100.684	875.242	121.917	951.558
96.7951	875.601	82.9818	952.917
65.2175	875.682	79.4496	953.566
85.3562	876.386	136.772	953.607
75.0257	876.997	120.099	956.677
72.6328	877.494	127.75	957.294
57.8913	877.549	95.7502	957.677
90.0865	877.945	68.8934	960.129
71.9217	877.976	91.9604	960.3
71.9648	878.86	129.466	960.772
77.5952	879.103	86.0905	961.495
66.475	880.557	85.7003	961.724
103.01	880.707	111.343	962.146
80.0123	881.251	94.1498	964.373
48.4776	881.697	127.789	966.036
73.2001	883.003	90.2777	966.38
78.6067	883.005	140.418	968.01
49.3913	883.075	134.268	968.071
76.1953	883.159	135.344	968.857
64.0572	884.526	136.985	969.596
53.9079	885.6	112.473	969.74
57.2041	886.688	138.477	969.8
48.1591	887.327	98.6658	969.893
50.3846	887.712	87.9134	970.091
37.7014	888.071	126.585	971.332
52.9762	888.486	158.233	972.85
83.3819	888.912	100.175	973.561
93.0582	889.115	151.235	974.662
60.6966	889.301	134.538	976.13
98.251	889.462	127.409	976.575
53.1295	890.645	120.811	976.62
39.5231	890.942	162.012	978.058
117.406	892.551	113.826	978.387
63.8029	894.67	102.594	980.055
58.8297	894.864	104.046	980.263
35.164	894.987	50.9988	981.016
107.929	895.867	134.292	981.371
71.5634	896.931	153.5	982.841
86.3528	897.904	143.204	983.633
95.1892	898.278	24.0913	984.267
75.4238	898.77	106.402	984.424
91.0001	899.072	104.142	984.469
107.273	900.318	104.454	986.451
87.8085	901.843	39.1934	987.466
74.8793	901.951	154.368	987.538
54.0991	902.333	141.249	988.714
96.5716	902.7	96.2159	988.802
86.0281	902.825	141.73	988.861
99.9576	903.027	123.402	992.426
45.3261	903.237	128.184	993.43
76.5711	903.978	149.273	995.114
104.928	904.392	64.5839	995.146
89.5264	904.599	87.732	995.902
90.7315	904.669	138.502	996.058
113.996	905.056	110.273	996.25
48.3427	905.56	115.428	998.63
14.6214	905.714	91.8307	998.816
79.4698	906.504	106.398	1001.81
86.7688	906.966	145.909	1002.22
80.3941	907.235	120.957	1003.2
80.7523	907.357	120.927	1006.39
54.0811	908.047	66.2047	1006.8
88.6392	908.601	142.169	1010.19
77.9603	909.031	84.9627	1013.39
81.5499	909.135	129.29	1014.09
84.6656	909.243	93.8651	1015.46
73.1941	909.655	153.33	1019.17
55.9389	911.052	92.4536	1019.91
71.892	912.031	88.8044	1020.65
63.1978	915.382	131.13	1023.1
80.6287	915.553	105.064	1023.74
82.0016	916.928	162.908	1027.35
82.5325	918.865	83.9457	1027.83
48.6004	919.503	111.788	1028.33
59.5609	919.96	75.031	1028.44
56.6499	920.453	105.848	1028.45
67.6087	920.715	105.551	1029.34
83.2363	921.931	85.8229	1029.98
104.439	922.033	93.9927	1030.04
60.9074	922.153	118.757	1030.44
65.7039	923.189	149.509	1032.72
93.2252	923.542	70.0996	1033.94
80.7517	923.672	139.138	1034.55
96.508	923.708	114.529	1035.22
112.468	923.708	121.811	1035.4
92.9211	927.364	143.513	1036.33
101.084	928.299	103.167	1036.52
76.2361	928.735	131.143	1036.62
39.9244	928.924	85.9616	1037.49
76.4779	930.324	128.864	1038.24
58.592	932.326	103.843	1040.18
94.1348	932.594	125.232	1044.2
58.3046	932.951	72.9098	1044.22
83.2436	933.303	97.9415	1045.54
104.852	936.606	133.081	1045.66
71.5276	937.07	128.789	1045.96
101.382	937.661	132.118	1046.04
84.5551	938.047	108.575	1046.12
94.5791	938.877	89.5363	1046.2
74.0794	939.718	65.692	1046.48
82.7425	940.105	62.3166	1047.1
90.6656	940.667	117.936	1050.02
104.959	942.4	119.392	1050.02
91.4829	942.436	148.144	1050.02
70.3745	942.65	136.27	1050.03
74.6141	943.739	146.248	1051.75
88.5381	944.236	112.019	1053.18
77.6504	944.246	146.269	1053.42
82.0674	944.866	123.309	1054.07
62.9234	946.414	145.117	1055.18
64.9406	946.949	153.343	1055.29
64.7281	947.153	156.364	1057.43
72.7367	947.772	168.186	1058.15
58.6695	948.098	166.309	1059.57
65.9577	948.869	104.453	1060.3
85.3474	949.538	127.263	1060.46
97.7343	950.135	185.493	1061.13
85.6614	951.58	56.3557	1061.77
95.8979	951.58	137.506	1062.03
49.8043	951.703	59.0234	1062.86
84.4296	952.151	104.142	1062.93
87.7984	952.549	138.145	1063.83
57.7512	954.06	111.102	1066.31
77.0874	954.428	99.9887	1066.68
46.7489	955.946	119.3	1067.75
80.7437	955.971	125.143	1068.7
82.3446	956.003	89.6274	1068.76
85.3886	956.128	104.593	1070.16
65.7247	956.368	158.455	1071.03
73.054	957.11	91.9941	1071.13
68.468	958.057	170.488	1072.12
33.2012	958.408	69.4186	1072.15
79.4761	959.149	131.826	1073.09
67.5221	959.308	118.954	1073.55
69.9608	959.368	107.715	1073.79
52.7277	960.285	154.58	1075.75
43.5896	962.9	144.391	1076.39
47.3417	963.133	116.7	1077.43
72.1214	965.155	170.246	1078.19
71.5091	965.304	129.463	1078.3
44.9068	966.779	145.301	1078.6
77.4105	966.935	113.297	1079.28
121.979	967.05	98.1281	1079.6
43.4952	968.242	102.801	1080.03
62.7298	968.395	119.919	1082.01
53.995	968.518	149.546	1082.57
47.9664	968.576	116.874	1082.84
45.6186	970.216	137.871	1085.05
113.83	970.286	126.587	1085.32
69.071	971.917	140.898	1086.15
81.2081	972.457	183.201	1086.54
76.4513	972.461	102.592	1086.79
79.5012	972.696	117.859	1086.84
53.3774	972.83	95.1439	1087.44
77.9637	973.161	139.554	1087.74
76.8736	973.597	119.623	1087.86
70.0466	973.754	83.7198	1088.64
91.8601	973.888	195.019	1089.52
86.6023	973.972	176.645	1093.78
87.907	974.992	97.8631	1094.63
65.2134	975.357	135.16	1095.82
63.8603	975.918	101.893	1096.65
75.9159	976.401	140.431	1097.47
62.2817	976.536	123.114	1098.4
62.7551	976.847	130.505	1099.99
95.1515	977.048	134.684	1100.55
93.9966	977.232	133.756	1101.21
86.7235	980.424	85.7398	1101.28
76.6059	981.364	135.868	1102.38
100.481	981.546	101.72	1102.66
70.7648	982.585	112.556	1102.78
96.7891	983.606	104.004	1103.2
97.3013	984.669	134.843	1103.25
103.794	984.934	65.6765	1104
77.4983	985.18	153.98	1104.68
93.1588	985.831	132.379	1104.69
52.7189	985.912	91.735	1104.94
89.3722	986.406	127.11	1105.78
65.7555	987.025	150.623	1106.2
84.072	987.711	121.544	1106.29
89.1854	987.747	61.6783	1106.41
71.8903	987.994	116.674	1107.32
63.2728	988.501	147.673	1107.65
76.346	989.738	160.288	1107.8
75.4931	990.551	111.144	1107.98
50.6943	990.772	155.518	1108.44
90.7624	991.355	85.3623	1109.76
76.9586	992.194	130.819	1111.14
101.622	994.741	88.9706	1114.22
88.6181	994.916	86.5896	1114.5
112.594	995.131	119.528	1115.16
88.9516	995.77	110.339	1117.56
35.8398	996.273	67.8661	1119.12
72.3026	996.359	140.664	1119.48
62.4201	996.574	114.097	1120.44
29.7906	998.064	111.524	1123.83
76.5043	998.9	100.738	1124.11
51.1032	999.332	112.371	1124.84
75.3684	1000.72	122.006	1125.47
88.6105	1001.15	123.895	1126.09
70.7704	1001.3	154.066	1129.45
24.8721	1002.19	111.992	1129.71
71.7052	1002.67	126.397	1131.41
58.0887	1003.17	120.325	1131.43
93.6232	1003.52	131.131	1132.84
62.87	1004.58	93.6195	1134.05
67.6086	1004.69	124.167	1134.07
79.3594	1004.7	141.034	1135.27
67.8927	1005.42	130.618	1135.4
61.8715	1006.03	154.81	1136.32
91.2243	1006.41	112.708	1137.3
61.925	1008.96	84.1365	1139.57
88.7257	1009.03	114.706	1140.51
43.5663	1010.77	121.056	1142.48
68.305	1010.95	123.981	1142.49
52.6953	1012.43	76.9064	1142.97
46.5538	1012.47	95.5466	1145.37
57.8855	1013.17	99.9008	1149.42
95.1727	1013.34	136.585	1149.45
33.3272	1013.36	117.07	1150.06
105.8	1013.56	126.388	1150.34
72.7489	1013.57	99.1837	1150.47
36.4148	1014.4	110.247	1151.27
104.726	1014.44	89.1057	1152.19
101.303	1015.26	127.577	1152.37
82.3172	1015.33	107.955	1153.21
107.375	1015.61	158.715	1153.85
85.4208	1017.82	163.433	1153.95
77.3648	1018.03	127.457	1154.05
90.5812	1019.74	124.441	1154.36
79.3008	1021.24	132.751	1155.22
64.92	1021.31	148.101	1156.34
94.2285	1021.57	130.203	1156.37
77.0356	1022.23	156.235	1156.62
89.4498	1022.71	119.852	1158.26
85.5368	1022.92	173.779	1158.81
64.491	1023.18	157.157	1159.76
66.7398	1023.44	123.744	1161
45.4841	1023.69	127.089	1163.65
78.0278	1024.42	91.2213	1163.82
45.2136	1024.99	138.946	1164.26
90.9078	1026.28	108.669	1165.61
73.6097	1026.66	100.89	1166.49
62.5268	1027.67	138.97	1166.92
64.229	1028.04	103.967	1167.2
98.6256	1028.52	127.225	1167.69
93.201	1029.52	90.3886	1168.18
52.8611	1030.2	158.291	1170.07
49.5499	1031.55	134.019	1170.24
57.0139	1031.67	112.234	1172.58
63.277	1032.13	182.818	1173.41
62.2468	1032.22	126.743	1173.49
101.697	1034.09	78.7627	1173.84
78.5627	1034.19	75.6678	1174.02
69.0313	1035.38	161.15	1175.68
64.058	1035.7	128.377	1175.83
66.1527	1037.6	117.212	1176.01
62.5993	1037.72	152.284	1176.72
71.3924	1038.5	115.443	1176.82
68.9775	1038.6	120.53	1177.25
83.9425	1038.75	132.677	1179.22
66.5502	1040.63	86.8708	1179.63
30.5466	1041.18	113.385	1179.68
55.1806	1041.77	134.145	1179.76
75.0057	1042.02	120.95	1180.85
41.3252	1042.16	137.622	1183.49
54.0433	1042.3	97.1076	1184.16
37.1892	1043.1	151.343	1184.87
98.3408	1045.33	155.526	1186.98
57.8231	1045.75	129.8	1187.51
50.5822	1045.84	103.885	1190.86
104.321	1046.31	127.067	1191.08
60.9649	1046.42	115.578	1191.23
95.6394	1046.43	128.152	1196.62
62.4284	1046.85	100.801	1197.37
129.581	1047.38	143.053	1198.18
55.114	1047.75	168.371	1198.36
40.1821	1047.76	136.877	1199.1
91.3308	1048.26	77.7528	1201.48
65.8934	1048.32	119.512	1202.68
118.336	1048.69	68.0164	1202.87
95.203	1049.15	81.4428	1204.37
88.9165	1050.59	146.364	1206.42
77.6279	1050.93	133.467	1208.26
91.1329	1051.19	83.0717	1208.54
67.9476	1051.75	136.6	1208.7
67.5581	1051.97	64.6646	1209.47
55.6128	1052.49	101.347	1210.4
62.6494	1052.89	133.359	1211.85
102.435	1053.2	118.713	1212.62
84.2457	1053.3	131.167	1213.6
108.494	1053.72	137.126	1213.99
53.9199	1053.84	136.748	1214.23
34.6368	1054.16	126.515	1214.99
93.1256	1054.44	115.813	1215.81
91.2891	1054.49	106.623	1215.86
88.1443	1054.84	71.684	1215.93
81.8119	1055.09	104.543	1216.62
104.445	1055.25	101.577	1217.26
53.7383	1055.25	67.7749	1217.41
35.103	1055.7	73.1028	1218.18
68.9303	1057.68	52.4575	1218.74
89.2059	1059.28	107.859	1221.23
71.6418	1061.73	106.732	1224.83
70.5681	1061.91	126.51	1225.12
68.7437	1062.53	72.449	1227.45
71.2674	1062.93	90.3124	1227.64
98.5433	1063.15	113.602	1228.71
60.1517	1063.55	105.526	1228.73
72.5201	1064.5	82.5254	1229.47
77.1679	1064.68	82.9878	1230.7
52.8955	1064.93	105.394	1230.95
53.1171	1065.83	105.303	1231.18
97.5061	1065.92	101.721	1231.9
79.6712	1066.47	77.9645	1232.41
44.3431	1066.88	105.743	1234.58
63.4895	1067.03	81.7739	1234.82
90.9346	1067.28	88.3037	1234.84
100.888	1067.38	111.917	1235.04
74.2857	1068.29	71.9507	1235.65
64.91	1070.12	124.856	1236.42
69.0887	1073.31	95.9362	1237.39
55.5189	1073.39	92.5466	1238.09
82.1206	1074.1	105.553	1238.76
85.7015	1075.47	82.1097	1239.71
103.756	1076.12	96.153	1241.47
88.0328	1077.42	96.037	1242.12
58.9553	1079.08	104.6	1242.15
90.5885	1080.4	98.1595	1242.18
58.9026	1081.21	76.4423	1243.02
47.8834	1081.59	96.3206	1243.88
74.6183	1081.62	98.1442	1245.23
91.7386	1081.68	105.515	1245.49
69.7547	1083.18	104.418	1246.02
76.8766	1083.32	91.1123	1248.85
87.5559	1083.34	87.9195	1249.48
84.9401	1085.24	44.9288	1251.08
67.2325	1085.87	72.4617	1251.5
89.5251	1086.23	100.256	1252.18
56.4553	1086.55	111.953	1252.36
87.2165	1087.25	96.3702	1253.66
96.4745	1087.71	120.538	1256.04
114.055	1089.33	128.383	1257.81
54.6355	1089.7	99.3824	1259.67
74.9874	1089.72	71.7235	1260
90.2363	1089.75	88.972	1262.47
60.7861	1090.25	86.2962	1263.97
103.826	1090.31	88.9	1267.67
72.6278	1091.54	78.4614	1267.92
100.527	1091.55	120.157	1269.49
83.6507	1092.99	98.8806	1270.3
68.7214	1094	83.9097	1271.91
66.4581	1094.05	88.3887	1272.67
102.654	1094.09	68.3709	1273.3
97.8396	1095.44	67.2014	1273.85
151.996	1095.69	104.875	1273.89
110.767	1095.73	103.806	1274.8
97.6101	1095.76	93.6093	1274.88
56.8727	1097.04	98.9817	1278.34
96.6832	1097.12	89.4726	1278.56
103.484	1097.43	96.699	1278.63
84.2585	1098.4	101.011	1278.78
98.6785	1099.62	80.9815	1279.29
132.098	1100.12	95.6867	1279.48
94.5896	1100.12	93.311	1280.11
113.874	1101.05	91.1548	1281.34
93.4067	1101.38	66.5445	1281.77
84.9932	1101.6	94.7091	1281.97
113.906	1101.79	62.9022	1282.74
88.0637	1102.59	80.3134	1283.44
78.0614	1103.4	88.0316	1284.26
91.2423	1104.54	112.071	1284.52
122.308	1104.56	126.74	1290.8
99.5881	1105.1	93.6121	1291.46
59.2255	1105.75	93.6009	1291.57
127.53	1106.73	66.9054	1292.84
93.8757	1107.85	78.5672	1292.87
89.8825	1108.26	89.8547	1293.48
102.87	1109.17	117.268	1293.7
138.915	1109.86	103.285	1294.45
100.373	1111.02	89.1931	1294.62
120.527	1111.32	87.9291	1295.52
87.3691	1111.97	94.6435	1295.52
98.3368	1112.26	78.9802	1297.16
87.2719	1112.55	110.526	1298.38
106.371	1112.89	111.742	1299.84
123.764	1115.6	103.6	1301.08
84.1591	1116.11	97.5221	1301.47
125.822	1116.45	111.51	1308.83
84.7738	1116.5	91.5511	1308.87
113.518	1118.37	94.01	1309.78
133.868	1119.4	87.7713	1310.85
115.499	1119.93	79.8174	1310.94
98.0691	1122.33	101.506	1311
116.387	1122.36	87.6271	1311.18
148.554	1122.4	78.3488	1313.3
97.9264	1122.56	63.8716	1313.56
92.5239	1124.24	76.4512	1314.71
93.1538	1124.42	90.2835	1314.92
113.407	1125.83	82.4891	1317.8
95.2337	1125.85	67.1155	1318.57
86.772	1126.32	89.6834	1319.18
117.071	1126.84	80.7556	1319.66
78.8028	1127.64	70.0851	1319.7
127.39	1128.13	86.2001	1320.64
127.138	1128.72	92.2331	1321.04
83.7687	1129.03	105.524	1321.22
131.109	1130.04	76.5892	1324.06
83.5179	1130.36	92.9228	1324.51
104.716	1130.79	98.2149	1324.62
63.0355	1131.03	91.7369	1324.77
115.258	1132.73	95.1789	1326.86
138.903	1132.73	100	1327.18
129.905	1135.45	103.895	1327.27
91.5032	1135.97	82.4446	1327.7
81.4948	1136.01	92.9425	1328.46
129.59	1136.45	107.97	1328.69
137.308	1137.28	72.6424	1330.2
105.962	1137.29	78.7291	1332.65
89.0437	1137.51	76.1486	1336.74
107.807	1137.93	98.6194	1337.27
93.332	1138.32	81.3219	1338.3
121.614	1138.45	97.2695	1338.45
62.9181	1138.61	78.7001	1338.65
83.9377	1139.13	67.4165	1340.3
114.482	1139.18	107.06	1341.13
99.1663	1139.26	80.2434	1341.38
108.534	1140.25	100.25	1341.55
126.208	1140.43	88.2343	1342.71
89.2498	1141.15	85.0351	1345.36
96.8537	1141.53	67.3091	1345.83
111.722	1141.66	85.6375	1346.95
92.5209	1142.36	87.3252	1348.04
132.177	1142.92	78.7093	1348.08
120.882	1143.68	83.6412	1351.32
87.964	1143.86	83.4002	1351.61
104.914	1144.01	92.1581	1352.16
94.1511	1144.56	80.894	1352.58
102.389	1145.06	93.6878	1353
52.8564	1145.36	95.5277	1353.73
69.5539	1146	56.3577	1353.81
67.84	1146.2	92.2351	1353.89
122.314	1146.48	91.5851	1358.54
115.489	1146.66	83.8797	1359.24
110.913	1147.62	96.7996	1361.86
87.1948	1148.43	111.93	1362.67
119.563	1148.83	107.102	1362.96
121.851	1150.22	98.6856	1363.64
119.047	1152.4	76.6577	1365.95
118.069	1152.94	109.95	1365.99
124.069	1154.51	62.7841	1366.41
80.1677	1154.9	89.2127	1367.93
106.923	1155.02	89.8006	1368.12
80.9256	1155.75	94.3223	1368.14
83.9702	1156.51	78.0743	1368.56
133.066	1156.78	92.0249	1369.93
127.354	1157.11	86.6284	1370.49
99.4258	1158.3	78.6884	1370.77
99.8335	1159.09	74.4988	1371.47
101.971	1159.13	80.656	1373.03
132.235	1159.47	79.9254	1376.18
75.8536	1159.5	67.3627	1377.91
113.475	1159.84	98.5366	1378.11
115.774	1160.02	86.8127	1378.78
106.522	1160.59	60.5781	1379.39
95.4415	1161.67	78.9665	1383
126.269	1163.48	87.4995	1383.2
85.9339	1163.57	110.005	1383.84
105.448	1165.19	72.7323	1385.13
104.059	1165.39	98.0306	1385.59
74.7803	1165.84	80.3772	1385.63
58.1459	1167.38	92.5901	1387.04
93.9822	1167.55	61.5541	1389.19
68.7214	1168.11	101.478	1390.1
96.1949	1168.64	81.6194	1390.2
93.0662	1171.45	124.433	1391.73
92.861	1171.69	93.6478	1392.77
125.675	1172.31	100.702	1393.67
105.818	1173.94	112.444	1394.56
120.997	1174.12	74.2345	1394.76
118.396	1175.64	109.363	1395.94
118.755	1176.18	96.7948	1396.85
101.58	1176.95	75.5247	1397.79
89.8306	1177.06	110.403	1398
88.5236	1177.28	110.061	1398.11
105.252	1177.83	76.417	1398.46
114.966	1178.18	91.2551	1399.12
67.2431	1179.45	88.9616	1400.94
103.108	1179.72	92.864	1402.2
89.2396	1183.12	103.612	1403.1
104.107	1183.22	78.8704	1403.94
74.6115	1183.28	78.9567	1405.71
65.1103	1183.78	75.3736	1406.51
125.9	1184.16	83.9374	1409.41
108.112	1184.29	71.5172	1409.91
119.312	1184.7	113.016	1411.4
91.897	1184.81	81.0158	1411.7
93.6521	1185.29	76.2932	1413.18
110.304	1186.69	88.4628	1414.25
115.406	1187.1	87.5657	1416.36
106.46	1188.63	71.4687	1416.46
72.513	1188.93	101.946	1420.62
56.8558	1189.39	68.2501	1420.87
99.0266	1189.53	106.522	1420.93
60.7185	1189.55	82.7111	1421.62
98.6585	1190.22	83.1105	1422.1
129.722	1191.25	107.382	1422.2
113.669	1191.94	110.683	1427.61
117.701	1193.35	78.4651	1430.86
94.927	1194.13	76.8306	1434.55
106.002	1194.81	52.2071	1435.11
112.782	1195.71	83.1291	1435.31
130.711	1196.32	83.5889	1436.06
114.546	1198.54	117.89	1437.05
110.261	1199.19	87.8352	1439.52
71.2988	1199.96	93.646	1439.81
67.4741	1200.63	82.9417	1444.14
85.7182	1201.36	95.506	1445.13
145.91	1202.98	106.324	1446.35
137.366	1205.55	80.0143	1446.51
136.383	1206.98	72.3548	1447.06
123.919	1207.09	92.3953	1447.6
95.1606	1207.17	73.5146	1447.85
95.5404	1207.37	91.3857	1448.27
90.2479	1208.51	80.583	1448.34
92.5541	1209.26	58.1229	1448.53
109.833	1210.39	57.2881	1452.04
90.4053	1212.55	91.7745	1455.1
124.975	1214.06	118.723	1457.7
99.865	1214.06	78.1128	1458.07
131.022	1216.49	79.115	1459.33
102.928	1216.98	86.1013	1459.79
120.072	1217.13	118.457	1459.92
102.055	1217.17	72.3058	1460.55
113.632	1217.66	71.2788	1460.61
100.924	1218.46	94.6356	1461.08
103.133	1219.15	122.173	1462.01
86.538	1219.17	70.5603	1462.54
106.515	1219.6	125.46	1463.06
102.529	1222.07	96.6167	1463.09
92.8169	1222.6	126.266	1464.7
81.5119	1223.11	98.721	1468.26
102.939	1223.25	72.7503	1468.49
109.622	1224	129.394	1469.9
70.6158	1225.53	114.126	1470.98
97.4514	1226.18	79.8776	1472.46
114.896	1228.39	64.5484	1475.72
123.596	1229.18	125.471	1478.8
80.7463	1232.08	85.421	1481.71
83.2036	1232.93	91.7882	1482.38
113.294	1234.08	102.233	1483.2
118.903	1234.11	101.218	1483.3
132.421	1234.23	89.0679	1483.79
130.554	1234.44	87.7344	1484.31
82.2256	1235.02	104.648	1484.45
156.232	1235.07	124.466	1486.03
147.913	1235.16	109.326	1486.58
95.2952	1235.39	103.787	1486.6
111.168	1235.55	122.252	1490.24
107.97	1235.63	100.617	1491.13
130.678	1236	100.15	1492.09
78.6817	1236.06	104.631	1492.13
94.8305	1236.26	64.2439	1492.95
128.676	1237.03	90.3771	1493.01
124.802	1237.38	95.5761	1494.32
118.534	1239.35	101.862	1494.33
83.2575	1239.71	155.114	1494.58
124.98	1239.72	131.498	1495.31
90.8847	1239.99	102.965	1495.73
136.501	1240.41	101.019	1498.97
149.652	1240.86	125.178	1499.81
78.5603	1241.98	68.3989	1500.23
101.571	1242.6	91.6831	1500.75
103.927	1243.74	71.0604	1505.06
96.7314	1245.5	76.8578	1507.24
89.0168	1245.84	104.772	1508.97
80.4532	1246.06	125.071	1509.82
70.5618	1247.24	102.227	1509.97
106.288	1247.42	93.3283	1512.15
126.196	1248.09	130.748	1512.67
65.1344	1249.28	68.3398	1513.02
146.392	1249.5	89.2203	1513.96
139.901	1250.11	55.3147	1516.01
109.875	1251.6	80.0125	1517.36
116.154	1251.73	136.485	1517.69
109.185	1252.13	81.469	1518.94
98.1372	1252.5	98.5116	1519.75
111.421	1253.19	100.5	1519.77
124.679	1253.21	66.2088	1521.26
81.1038	1253.28	83.2664	1521.64
92.8931	1253.37	108.055	1522.08
115.72	1254.3	75.1536	1522.21
102.034	1255.05	54.2221	1522.9
90.9832	1255.98	133.124	1525.7
106.766	1256.12	78.9835	1527.62
130.563	1256.34	81.4909	1528.37
107.546	1257.66	97.9604	1528.87
95.2379	1258.07	85.7599	1530.72
116.002	1258.23	82.0865	1530.87
104.952	1258.57	89.6249	1531.83
108.01	1258.65	75.0564	1531.89
125.393	1258.82	103.732	1532.78
105.376	1259.29	117.337	1533.14
95.2614	1260.5	78.288	1533.31
80.8775	1260.57	122.012	1533.99
104.72	1260.8	77.142	1534.2
86.6271	1260.95	108.307	1535.4
86.8843	1261.98	99.315	1536.59
127.977	1262.21	53.3464	1538.02
126.935	1262.23	86.7121	1538.92
115.583	1262.56	83.9619	1539.12
55.8747	1263.12	137.446	1539.88
89.0572	1263.76	111.849	1542.21
122.514	1263.87	126.511	1542.54
114.333	1263.98	94.4748	1542.81
145.654	1265	53.97	1543.67
106.1	1265.89	108.315	1543.93
98.8141	1266.14	95.213	1544.39
91.805	1266.41	97.5906	1545.72
115.071	1268.79	76.1071	1548.93
78.7336	1269.97	116.311	1550.5
91.0749	1273.57	95.964	1551.37
125.185	1274.99	110.877	1552.46
92.7895	1275.21	89.6586	1554.01
51.485	1275.28	73.1486	1558.1
112.522	1275.35	61.6588	1559.3
71.7104	1276.11	73.4984	1559.64
84.5146	1276.24	109.062	1560.49
126.468	1276.55	109.373	1561.06
116.136	1276.81	122.058	1561.44
91.2016	1277.07	76.9645	1566.52
147.196	1277.36	111.79	1567.33
108.579	1278.1	99.3088	1567.58
122.617	1278.3	76.8125	1570.47
123.013	1278.37	82.3085	1571.24
141.986	1278.71	115.62	1574.25
89.1557	1279.23	126.091	1575.41
93.9448	1279.4	103.298	1575.86
143.883	1279.57	118.22	1576.64
97.9938	1279.75	104.637	1577.64
97.0537	1280	66.8117	1579.04
109.62	1280.03	69.3154	1581.5
108.197	1280.22	68.4724	1582.28
90.1015	1280.3	87.8906	1582.85
105.005	1280.34	128.575	1583.86
66.6095	1280.79	87.6729	1585.85
91.3623	1281.18	84.3131	1585.93
134.524	1281.67	59.6547	1585.98
128.56	1282.69	70.5388	1586.73
107.277	1282.8	62.6361	1587.74
87.242	1283.08	63.7217	1588.98
123.508	1284.32	120.515	1589.59
116.777	1285.53	78.3314	1589.75
104.34	1285.62	99.0401	1592.68
142.129	1286.93	101.733	1594.32
98.2188	1287.34	101.327	1597.46
117.102	1288.09	90.0761	1598.17
86.1821	1288.88	114.974	1598.42
124.808	1289.12	91.1151	1601.06
70.5959	1289.21	99.5303	1601.11
112.554	1289.44	58.5816	1601.9
115.35	1290.07	74.098	1601.96
100.857	1290.64	106.766	1602.3
105.18	1291.37	81.0143	1602.36
121.367	1291.41	116.434	1602.85
136.989	1291.77	28.0397	1603.42
122.956	1291.84	87.9983	1603.45
87.1907	1294.01	129.232	1603.52
134.065	1294.64	139.938	1603.79
68.8525	1294.78	112.538	1604.19
104.887	1295.44	119.405	1605.45
103.078	1295.59	76.7791	1605.58
118.15	1295.93	116.221	1606.19
91.3681	1296.12	108.38	1606.9
102.765	1297.98	70.3713	1609.62
75.0181	1299.34	107.451	1615.05
99.3395	1300.33	149.806	1616.92
116.803	1300.51	92.2594	1617.24
93.712	1300.55	104.833	1617.46
84.4406	1301.22	94.0352	1620.62
89.5607	1304.02	100.644	1621.62
89.4926	1304.32	69.3528	1622.74
112.61	1304.89	118.786	1623.61
121.492	1305.44	106.701	1624.7
114.458	1305.58	117.293	1625.02
101.143	1306.11	112.822	1627.31
87.4823	1306.65	126.581	1628.16
75.5138	1307.38	106.697	1628.76
120.765	1309.76	121.459	1630.61
138.235	1310.53	97.1187	1631.08
141.898	1312.76	136.132	1631.33
107.131	1313.08	79.0379	1631.47
124.816	1313.27	97.4744	1632.47
115.169	1313.82	75.4644	1636.66
103.104	1315.06	92.8742	1637.01
94.7327	1315.16	113.154	1638.35
121.836	1315.71	115.638	1640.65
109.51	1316.15	116.502	1640.74
117.005	1316.69	99.0797	1640.88
116.149	1316.7	66.4962	1641.36
113.582	1316.97	71.6914	1643.47
141.236	1318.31	66.9609	1643.74
102.144	1318.57	101.83	1643.79
73.6572	1319.95	109.795	1643.79
125.729	1320.56	67.678	1644.64
89.2733	1321.76	84.4549	1644.85
108.619	1322.85	95.2479	1647.85
116.489	1323.65	75.135	1648.53
133.9	1325.2	77.7764	1648.54
137.529	1325.61	98.3183	1648.93
109.56	1328.3	84.7807	1650.15
104.343	1328.39	82.4139	1650.77
85.8442	1328.56	98.1703	1652.46
118.078	1329.08	90.7893	1652.65
117.939	1329.6	124.243	1652.67
115.634	1330.72	111.758	1652.74
116.48	1330.97	99.1644	1654.03
104.382	1331.71	52.9498	1654.21
85.389	1331.77	115.506	1654.96
86.2695	1331.91	88.1583	1655.8
110.089	1332.83	111.18	1656.38
154.614	1332.85	76.524	1656.45
106.981	1333.07	122.839	1656.77
94.7091	1334.04	85.7513	1658.32
90.8035	1334.33	92.6301	1662.04
104.702	1335.01	112.802	1662.42
82.3241	1336.01	79.8908	1663.32
61.0356	1336.59	97.336	1663.62
108.154	1336.93	64.9856	1664.14
101.595	1338.21	90.8059	1665.3
86.2114	1340.2	108.706	1665.34
98.1986	1340.9	96.7278	1668.66
109.325	1341.68	128.671	1670.43
105.716	1341.94	95.6046	1672.78
93.8567	1344.51	89.6243	1673.9
102.327	1345.33	97.666	1674.02
88.0506	1346.84	92.9629	1674.44
113.797	1347.97	109.992	1674.79
111.059	1348.21	105.724	1675.88
96.2203	1348.35	108.91	1676.01
83.7877	1348.63	112.307	1677.06
86.9373	1349.93	75.2477	1677.66
73.5208	1350.13	113.231	1677.98
111.883	1351.67	141.904	1678.14
31.008	1352.79	104.681	1678.99
112.247	1353.15	66.3105	1679.34
117.148	1355.22	64.3124	1680.78
72.5056	1356.11	95.7731	1681.71
122.671	1356.91	85.4837	1683.27
96.8532	1357.87	76.3371	1683.79
112.993	1359.18	130.671	1685.6
130.826	1359.52	102.249	1686.74
47.0827	1359.78	79.459	1687.16
94.5779	1359.88	88.1157	1687.45
116.762	1360.33	105.325	1688.32
97.9394	1360.5	96.4781	1690.3
128.821	1361.26	93.3107	1691.23
77.2213	1361.81	96.8493	1694.76
111.7	1362.03	105.782	1694.84
106.401	1362.2	113.504	1695.65
72.8616	1364.34	134.14	1695.88
117.911	1364.92	73.9261	1696.3
118.216	1365.33	103.065	1696.73
128.019	1365.33	100.758	1697.15
104.825	1365.36	100.941	1698.52
111.295	1365.82	67.9253	1701.38
95.6328	1367.05	102.64	1703.22
103.237	1367.15	76.5693	1708.35
126.552	1368.87	95.5363	1709.95
88.1636	1368.89	121.497	1710.18
98.4577	1369.24	98.1798	1710.28
78.6914	1369.82	105.736	1710.97
84.2012	1369.95	100.037	1711.26
97.8463	1370.66	94.3087	1712
74.4318	1370.73	130.851	1712.23
97.6357	1371.4	92.772	1712.56
111.456	1371.63	132.307	1713.05
102.35	1372.1	116.969	1713.23
98.6136	1372.12	81.0291	1714.17
75.3235	1373.49	114.039	1716.29
104.219	1374.64	71.9293	1716.48
86.72	1376.1	70.5567	1717.1
93.8661	1376.27	128.296	1720.07
120.939	1376.65	74.9159	1720.09
145.126	1377.96	139.682	1723.74
110.192	1378.22	90.1729	1725.32
126.606	1378.47	89.7206	1725.92
149.408	1379.08	124.524	1726.51
84.4336	1379.37	118.193	1727.85
100.07	1379.47	103.743	1728.78
84.2077	1380.61	105.009	1728.87
123.738	1381.33	78.8852	1730.06
69.2768	1381.37	89.657	1732.04
71.4334	1383.04	84.4127	1732.65
85.1479	1383.61	84.4573	1733.75
120.332	1383.8	135.393	1735.42
70.3054	1384.23	132.985	1736.15
86.6901	1384.81	100.889	1737.59
104.785	1385.11	57.8168	1737.97
89.7185	1386.75	134.806	1739.27
101.86	1386.99	120.523	1739.37
160.182	1387.71	97.1616	1739.48
125.782	1387.79	104.102	1741.21
71.6613	1388.95	109.724	1741.6
108.873	1389.71	95.5319	1742.1
96.0264	1389.74	55.3418	1742.64
122.048	1392.24	81.0078	1742.64
145.6	1394.03	109.135	1743.39
112.268	1395.07	121.383	1743.9
121.574	1395.08	93.3023	1745.94
98.8478	1395.19	113.831	1747.73
101.52	1395.95	118.211	1747.94
99.951	1396.07	112.954	1748.23
154.146	1396.43	87.6565	1748.81
91.8024	1396.5	99.357	1758.01
115.579	1397.85	68.3494	1758.47
107.467	1398.02	85.1731	1759.75
104.133	1398.05	120.467	1762.76
107.906	1398.34	75.1274	1764.7
120.06	1399.17	88.814	1764.98
78.3557	1399.29	123.693	1765.58
88.2777	1399.36	97.3125	1768.84
107.821	1399.98	89.4525	1770.88
90.4294	1401.63	97.8174	1771.11
96.9138	1402.15	87.7941	1771.76
71.5203	1403.37	70.6691	1773.56
113.411	1403.62	118.116	1773.57
120.544	1403.69	99.0637	1774.12
80.9159	1404.02	70.2679	1774.64
64.3386	1405.17	110.574	1775.15
122.199	1405.97	135.109	1775.15
127.635	1406.01	102.705	1777.19
86.2527	1406.5	85.152	1779.1
105.069	1407.5	130.937	1780.84
101.228	1407.77	85.4973	1782.16
84.2241	1407.98	85.5201	1783.15
118.587	1408.06	91.2854	1783.4
100.801	1408.16	75.5355	1783.59
83.8961	1408.26	103.416	1783.78
72.0102	1408.42	114.03	1787.04
131.292	1408.47	95.0492	1789.22
101.597	1408.67	51.4417	1791.92
112.507	1408.68	73.1232	1794.68
86.9889	1409.12	116.733	1796.57
85.7779	1410.36	83.8101	1796.64
114.682	1410.69	82.3377	1796.7
67.0053	1410.76	98.37	1797.62
84.7675	1411.38	94.9116	1797.97
92.0752	1411.6	96.0263	1798.12
132.135	1412.21	114.816	1799
98.796	1414.16	88.9937	1799.81
112.48	1415.43	81.2453	1806.65
43.1533	1415.89	118.52	1807.31
119.104	1417.56	117.444	1807.94
94.7514	1418.02	99.5048	1809.84
112.527	1418.16	145.023	1810.06
80.8919	1419.15	60.8476	1811.03
86.3756	1419.59	117.904	1817.51
65.0505	1420.33	80.0693	1821.33
124.307	1422.12	98.2929	1821.34
106.562	1422.14	90.8041	1822.12
114.34	1422.3	92.8276	1823.11
116.22	1422.69	79.1867	1824.1
80.1288	1423.25	95.4172	1824.14
99.5612	1423.63	105.509	1825.85
86.9727	1423.9	108.91	1826.34
120.301	1424.31	75.1574	1832.16
83.8091	1425.6	106.806	1833.67
86.3263	1426.1	108.607	1834.7
98.3499	1427.41	94.6911	1834.86
129.969	1427.45	107.717	1836.98
94.4933	1428.69	110.61	1838.08
84.6312	1430.05	130.646	1838.5
124.406	1430.24	117.234	1839.64
94.8338	1430.52	82.1833	1843.84
104.796	1431.64	116.164	1844.21
132.837	1434.86	103.074	1851.37
116.845	1434.87	90.4877	1851.61
109.629	1435.05	76.0032	1851.81
107.961	1435.25	107.655	1851.87
103.305	1437.51	79.4362	1855.31
126.531	1438.04	69.5729	1856.98
76.9455	1438.35	117.994	1860.09
136.323	1438.79	115.066	1860.11
130.178	1445.38	100.473	1860.26
156.277	1446.02	59.0519	1861.7
129.552	1446.16	88.2096	1862.34
147.768	1447.35	79.7379	1862.69
119.776	1447.93	100.605	1863
141.837	1448.75	111.476	1865.29
115.644	1450.79	83.1555	1865.92
148.68	1451.16	107.036	1867.96
112.398	1451.66	78.4189	1869.53
115.664	1452.14	84.7058	1872.17
109.113	1453.49	87.1434	1873.19
133.13	1453.64	77.3265	1873.28
129.142	1456.15	124.343	1874.19
81.4881	1457.23	76.9106	1876.54
116.53	1458.11	129.881	1877.64
106.745	1458.49	89.0725	1881.18
122.775	1459.18	89.0392	1881.45
148.362	1459.73	84.366	1884.21
96.3758	1460.84	95.7876	1887.37
80.7758	1460.94	95.8737	1888.22
159.647	1461.48	131.953	1889.92
73.7485	1461.52	99.7011	1889.98
110.591	1461.75	103.33	1891.75
91.3124	1461.89	84.8788	1894.42
81.5093	1462.13	112.044	1895.11
168.928	1462.16	62.8691	1895.16
132.811	1462.17	99.3249	1895.43
77.578	1462.33	105.177	1897.94
121.836	1463.37	80.3587	1898.24
123.504	1463.41	89.0074	1898.84
136.012	1463.53	112.01	1901.32
101.36	1463.91	85.6747	1902.14
94.2038	1464.76	96.794	1903.42
129.786	1464.79	98.9189	1904.38
169.923	1465.47	112.321	1904.44
110.689	1466.2	113.996	1906.59
126.128	1467.45	88.1217	1906.81
96.5829	1470.07	69.8378	1907.58
159.171	1470.42	103.215	1911.59
95.064	1470.79	118.473	1915.26
106.631	1471.59	90.068	1924.79
129.259	1471.76	93.399	1926.74
160.833	1471.96	118.514	1929.12
82.5949	1471.97	78.6093	1929.29
171.066	1474.31	93.9652	1929.46
153.267	1474.57	85.4301	1929.5
109.709	1474.61	107.483	1929.72
126.566	1474.71	98.7903	1930.41
98.7131	1474.93	127.874	1931.51
71.3803	1475.08	121.153	1933.23
96.2102	1475.15	105.462	1933.64
85.5969	1476.07	116.465	1933.86
161.171	1476.48	72.6329	1934.19
38.7193	1477.75	123.403	1934.82
133.098	1478.37	91.4134	1938.21
98.8001	1478.57	79.9954	1939.12
91.1915	1479.28	91.9151	1939.46
146.409	1479.51	90.5268	1945.74
108.295	1479.56	96.6346	1946.46
91.1949	1479.93	61.8005	1948.14
137.774	1480.01	91.3538	1949.53
87.7217	1480.08	106.418	1952.63
136.745	1480.96	93.8343	1952.95
38.4155	1481.88	106.391	1954.43
100.647	1482.39	117.578	1958.24
123.076	1483.42	95.6692	1958.94
151.111	1484.35	114.651	1962.94
119.715	1485.21	137.934	1963.02
101.548	1486.32	65.1075	1963.15
130.518	1486.69	107.745	1968.11
48.174	1487.68	108.204	1968.31
101.185	1487.83	111.468	1970.52
61.6734	1488.05	86.5897	1970.69
111.745	1488.55	78.981	1973.39
165.011	1488.74	102.345	1977.4
97.0091	1488.76	97.7057	1979.62
96.9327	1488.93	95.4647	1983.46
130.674	1490.27	86.4373	1986.39
128.059	1490.55	104.062	1987.37
101.907	1490.7	77.2231	1987.69
164.988	1492.56	75.9294	1989.23
84.6395	1493.19	106.365	1989.49
84.7736	1497.03	116.271	1989.7
92.7202	1497.35	118.636	1993.71
52.1942	1499	110.159	1997.87
91.6575	1499.73	92.4896	2001.89
151.977	1500.63	139.548	2001.96
84.8877	1501.01	138.664	2004.23
34.3575	1501.31	137.23	2009.85
78.7218	1501.61	127.031	2012.07
124.758	1503.5	110.42	2013.76
150.096	1504.71	106.064	2015.37
93.1082	1505.17	131.15	2020.47
161.581	1505.39	154.581	2021.67
48.0633	1506.61	137.312	2021.87
139.218	1506.73	114.088	2023
114.531	1507.95	114.548	2026.28
91.8302	1509.63	139.621	2034.05
141.644	1511.55	95.6155	2035.39
127.958	1511.71	105.691	2035.5
122.368	1512.19	119.819	2037.35
92.1278	1512.33	137.823	2037.79
135.886	1514.16	124.398	2037.82
117.888	1516.5	139.801	2039.5
86.9756	1518.22	86.0381	2041.1
88.7141	1518.56	96.6971	2042.51
120.5	1519.34	143.586	2046.51
155.112	1519.72	136.319	2049.64
73.1809	1520.74	110.935	2050.4
109.238	1521.92	124.411	2051.07
97.4225	1523.14	114.748	2053.62
145.339	1523.63	139.738	2054.33
88.7716	1523.72	109.097	2056.08
133.466	1524.32	141.372	2056.38
159.913	1525.5	92.119	2056.91
133.294	1525.7	109.403	2057.22
129.346	1526.54	115.581	2058.66
36.5417	1528.09	140.678	2059.26
159.622	1528.19	98.7366	2064.44
142.001	1528.58	122.21	2067.16
139.039	1528.89	144.138	2072.29
155.913	1529.88	119.404	2073.58
98.4083	1531.49	86.2082	2074.81
163.784	1531.64	163.493	2076.53
152.94	1532.21	126.952	2079.14
88.2727	1532.47	129.135	2082.47
94.5924	1533.24	164.351	2082.92
102.826	1533.42	140.849	2086.08
153.735	1533.82	139.354	2090.19
135.38	1535.22	104.566	2094.33
93.2744	1539.59	154.675	2094.74
139.58	1541.88	104.406	2096.94
197.377	1542.22	130.134	2104.09
135.098	1543.26	120.241	2104.49
129.48	1543.38	125.974	2111.35
139.534	1544.99	128.732	2113.42
102.95	1545.23	104.23	2113.62
82.2329	1546.2	120.641	2113.97
69.0533	1546.22	104.671	2117.99
127.655	1546.46	134.822	2118.77
[truncated: 490 more rows]
